# Supplementary material for: A novel value-based multi-criteria decision making approach to evaluate new technology adoption in SMEs
Source: PeerJ Comput Sci. 2022 Dec 9;8:e1184. doi: 10.7717/peerj-cs.1184 (PMC9748816; doi:10.7717/peerj-cs.1184)
Supplement: Supplemental Information 2 [file peerj-cs-08-1184-s002.xlsx]

## Sheet: Sheet1
	Parameter	Description	High	Medium	Low	Don't Know
	Customer experience (ease of use)	refers to everything about a company that influences a customer's opinion and feelings about it. It is company's connection with its customers which covers every interaction and ease of using the system.
	Value to Business and organization fit	delivering exceptional goods and services to customers that are worth their time, effort, and money aligned with the organization's general culture and standards.
	Ease of Implementation and its Cost	refers to the overall ease in implementing or installing the technology and its associated total cost incurred.
	Time and cost Saving with technology	refers to the overall benefit of derived from technology that will reduce an organization's overall spending in terms of cost and time.
	Increase in productivity	refers to the enhancement in overall performance in terms of output from the same amount of inputs.
	Cost and time for training	refers to the cost and time it takes to train employees on new technology.
	Transition and technical support	refers to the vendor's help during the transition and after deployment with installation, upgrades, troubleshooting, and security.
	Security and Reliability	security, refers to the guarantee that the system is performing as expected, on the other hand reliability refers to the guarantee which ensures that the system is performing as expected.
	Tactic advantage	an action or plan aimed at assisting someone in achieving their goals in a certain setting
	Strategic advantage	refers to your overall ability to outcompete, as well as your returns to stakeholders including investors, employees, and communities.
