# Supplementary material for: A novel value-based multi-criteria decision making approach to evaluate new technology adoption in SMEs
Source: PeerJ Comput Sci. 2022 Dec 9;8:e1184. doi: 10.7717/peerj-cs.1184 (PMC9748816; doi:10.7717/peerj-cs.1184)
Supplement: Supplemental Information 4 [file peerj-cs-08-1184-s004.xlsx]

## Sheet: Sheet2
Respodent	Customer experience (ease of use)	Value to Business and organization fit	Ease of Implementation and its Cost	Time and cost Saving with technology	Increase in productivity	Cost and time for training	Transition and technical support	Security and Reliability	Tactic advantage	Strategic advantage
1	Medium	High	Medium	Medium	Medium	Low	Medium	High	Medium	Low
2	High	Medium	High	Medium	Medium	Low	Medium	High	Medium	Low
3	Medium	Medium	Low	High	High	High	High	Medium	Low	Medium
4	High	Medium	High	Medium	Medium	Low	High	High	Medium	Low
5	High	High	High	High	High	Low	High	High	Don't Know	Low
6	High	High	High	High	High	Low	Medium	Low	Low	Low
7	High	Medium	Low	Medium	High	High	Low	High	Low	Medium
8	Low	High	High	Medium	Medium	Medium	High	High	Low	Medium
9	High	Low	Medium	Don't Know	High	Medium	High	High	Low	High
10	High	High	High	Low	Medium	Low	Medium	Medium	Medium	Low
11	High	Medium	Medium	Medium	High	High	Medium	High	Low	Medium
12	High	Medium	Low	High	Low	Low	Medium	Low	Low	Medium
13	Medium	High	High	High	High	Low	High	High	Low	Medium
14	High	Low	High	Medium	Low	Medium	High	High	Low	Medium
15	High	High	High	Medium	High	Low	Low	Medium	Medium	Medium
16	High	Medium	High	High	Medium	Low	High	Don't Know	Medium	Low
17	Medium	Medium	High	High	High	Low	Low	High	Low	High
18	High	High	Medium	High	High	Medium	Low	High	Low	Low
19	Low	Low	High	High	Medium	Low	High	Medium	Low	Medium
20	High	High	Don't Know	Medium	Medium	Low	Medium	High	Medium	Medium
21	Low	Medium	High	Medium	High	High	Medium	Low	Low	Medium
22	High	Medium	Low	Medium	Medium	Low	High	High	Low	Low
23	Low	Medium	High	Medium	High	Medium	Low	High	Don't Know	Medium
24	High	High	High	High	High	Medium	High	High	High	Medium
25	High	High	Medium	High	High	Low	High	Medium	Medium	Low
26	Low	High	High	Don't Know	Low	Low	Medium	Medium	Medium	Low
27	Low	High	Low	Medium	Low	Medium	Medium	Medium	Low	Medium
28	High	Low	High	Medium	Medium	Low	Medium	Medium	Low	Medium
29	Medium	High	High	Medium	High	Medium	Medium	Medium	Low	Low
30	Medium	High	Medium	High	High	Medium	Medium	Medium	Low	Low
31	High	Medium	Medium	Don't Know	Medium	Medium	High	High	Medium	Low
32	Medium	Medium	Medium	Medium	Medium	Medium	Medium	High	Medium	Low
33	Low	Medium	Low	Medium	Low	Low	High	High	Low	Low
34	High	High	High	Medium	High	High	High	Low	Low	Low
35	High	High	Don't Know	High	High	High	Medium	High	Medium	Low
36	High	Low	High	Medium	Low	High	Medium	High	Low	Low
37	Medium	High	High	High	Low	Low	High	High	Low	Low
38	Medium	High	High	High	Low	Medium	Medium	Medium	Low	Low
39	Medium	Medium		Medium	Low	Medium	High	Medium	Medium	High
40	High	Medium		Medium	Low	Medium	High	High	Medium	Low
41	Medium	Don't Know		Medium	Low	Low	High	High	Low	Don't Know
42	High	Medium	Low	High	High	Low	Medium	Medium	Medium	Low
43	High	High	Medium	High	High	Low	Medium	Medium	Medium	Low
44	High	High		Low	Low	Low	High	Low	Medium	Medium
45	Medium	Medium		Don't Know	Low	High	High	High	Low	Medium
46	High	Low		High	High	High	Low	High	Medium	Low
47	Medium	Medium	Low	Low	High	Low	Medium	Low	Low	Low
48	Medium	Medium		Low	High	High	High	High	Medium	Low
49	Medium	High	Medium	Low	High	Low	Medium	High	Low	Low
50	High	High		High	Medium	Low	Medium	High	Low	Medium
51	Medium	High		Low	Low	Low	Medium	High	Low	Low
52	High	Low	Low	Low	High	Low	High	High	Medium	Low
53	High	High		Medium	Medium	Low	High	Low	Medium	High
54	High	High		Medium	Medium	Low	High	High	Medium	Low
55	Medium	Medium	Medium	Low	Medium	High	High	High	Medium	Low
56	Medium	Medium		Low	Medium	High	Don't Know	High	Low	Low
57	High	Don't Know	Medium	Low	Medium	Low	High	Medium	Low	Medium
58	High	High		High	Low	Low	Medium	Medium	Low	Medium
59	Medium	High		High	High	Low	Medium	Medium	High	Medium
60	Medium	High		Low	High	Low	High	High	Medium	Medium
61	High	High	Medium	High	Medium	Low	High	Low	Medium	Medium
62	Medium	Medium		Low	Medium	Low	High	High	Medium	Low
63	High	High	Don't Know	High	Medium	Low	Medium	High	Medium	Medium
64	High	High		Medium	Medium	Low	High	High	Medium	Low
65	High	Low		Medium	Medium	Low	Medium	High	Low	Low
66	Medium	High	Medium	Low	Medium	Low	Medium	Low	Medium	Medium
67	High	High		Low	High	Low	High	High	Low	Medium
68	Low	High	Don't Know	High	High	Low	High	Medium	Medium	Medium
69	Medium	High		Medium	High	Low	Low	Medium	Low	Medium
70	High	Medium		Low	High	Don't Know	High	High	Low	Medium
71	High	Medium		Low	Medium	Low	Medium	High	Medium	Low
72	Medium	High		Low	High	Low	Medium	High	Low	Low
73	High	Don't Know		Low	High	Low	Medium	Low	Low	Low
74	High	High	Medium	High	Medium	Low	High	High	Low	Low
75	High	Medium		Medium	Medium	High	Medium	Medium	Low	Medium
76	High	Medium	Low	High	Medium	Low	High	Medium	Low	Medium
77	low	Medium		Medium	Medium	Low	Medium	Medium	Low	Medium
78	low	High		Low	Medium	High	Low	High	Low	Medium
79	High	Medium		Low	Medium	Medium	High	High	Low	Low
80	High	High	Medium	Medium	High	Low	Don't Know	Medium	Don't Know	Low
81	High	High		Medium	High	High	High	Medium	Low	Low
82	High	Medium		Low	Medium	Low	High	High	Low	Low
83	High	High	Low	Low	Low	High	High	High	Low	Low
High	49	42	22	26	35	16	40	48	2	4
Medium	24	30	16	31	32	15	33	24	31	33
Low	10	8	11	22	16	51	8	10	47	45
Don't Know	0	3	4	4	0	1	2	1	3	1
