# Supplementary material for: A novel value-based multi-criteria decision making approach to evaluate new technology adoption in SMEs
Source: PeerJ Comput Sci. 2022 Dec 9;8:e1184. doi: 10.7717/peerj-cs.1184 (PMC9748816; doi:10.7717/peerj-cs.1184)
Supplement: Supplemental Information 5 [file peerj-cs-08-1184-s005.xlsx]

## Sheet: Respodents Data
Respodent	Customer experience (ease of use)	Value to Business and organization fit	Ease of Implementation and its Cost	Time and cost Saving with technology	Increase in productivity	Cost and time for training	Transition and technical support	Security and Reliability	Tactic advantage	Strategic advantage
1	1	1	1	1	1	2	1	1	1	1
2	1	1	2	1	1	2	1	1	1	1
3	1	1	1	1	1	1	2	1	2	1	1= Very High
4	2	2	2	1	1	2	1	1	1	1	2=High
5	1	1	2	1	2	1	1	1	1	2	3= Medium
6	1	1	2	1	1	2	1	2	2	1	4=Low
7	1	1	2	1	2	1	2	1	1	1	5=Very Low
8	2	2	2	1	2	1	2	2	1	2
9	1	2	1	1	1	2	1	2	1	1
10	2	1	1	2	1	2	1	2	1	1
11	1	2	2	2	1	1	1	2	1	2
12	1	1	1	1	1	2	2	1	2	1
13	1	1	1	1	1	1	1	1	1	2
14	2	2	2	2	2	2	1	1	1	1
15	1	1	2	1	1	1	1	1	1	1
16	2	2	2	2	2	2	1	2	2	1
17	1	2	1	1	2	1	2	1	1	1
18	1	1	2	2	1	1	1	1	2	1
19	1	2	2	2	1	1	1	2	1	1
20	1	1	2	2	1	2	2	2	1	2
21	1	2	2	2	2	2	2	1	2	1
22	2	1	2	1	2	2	2	2	1	1
23	1	1	1	2	2	1	1	1	1	1
24	2	2	2	1	1	1	2	1	1	2
25	1	2	2	2	1	1	1	1	2	1
26	1	1	2	1	2	2	2	2	1	1
27	2	2	1	2	1	1	2	1	1	1
28	1	2	2	1	1	1	1	1	1	2
29	2	1	2	2	2	1	2	1	1	1
30	1	2	1	1	2	1	2	1	1	2
31	1	1	2	2	1	2	2	1	1	1
32	1	2	2	2	1	1	1	2	2	1
33	1	1	2	2	1	1	1	1	1	2
34	2	1	1	2	1	1	2	1	1	1
35	2	2	1	2	1	1	1	1	2	2
36	2	1	2	1	1	1	1	1	1	2
37	1	1	1	1	1	1	1	2	1	1
38	1	2	2	1	1	2	2	2	1	1
39	2	1	1	2	1	2	1	2	2	1
40	1	2	1	2	1	1	1	2	1	2
41	1	1	2	2	2	2	2	2	1	2
42	1	2	1	1	1	1	2	1	1	2
43	1	2	2	2	1	1	2	2	2	1
44	2	2	2	1	2	2	1	2	1	2
45	1	1	2	1	1	1	2	1	2	2
46	2	1	1	1	1	2	2	1	2	2
47	1	2	2	2	1	1	1	2	1	2
48	2	1	1	2	1	2	1	2	2	1
49	1	1	1	2	1	1	1	2	1	2
50	1	2	2	1	1	1	1	1	2	2
51	1	1	2	2	1	1	2	2	2	1
52	2	2	1	2	2	2	2	1	2	2
53	1	1	2	1	2	2	2	1	1	2
54	1	1	2	2	2	1	2	1	1	1
55	1	1	2	2	1	2	1	2	2	2
56	2	2	2	1	2	1	2	1	1	2
57	1	1	1	1	1	1	1	2	1	2
58	2	2	1	1	2	2	2	2	1	1
59	2	2	1	1	2	1	2	2	1	1
60	2	1	1	1	2	1	1	2	1	2
61	2	2	2	1	2	1	1	2	2	2
62	2	1	1	2	2	1	1	2	2	2
63	2	2	2	2	2	2	2	1	1	1
64	1	1	1	1	2	1	1	1	1	2
65	1	2	2	2	1	2	2	2	1	1
66	1	2	1	2	1	2	2	2	2	2
67	1	1	2	2	2	2	1	2	1	1
68	2	1	1	2	2	1	2	1	1	1
69	1	1	1	2	2	2	1	1	1	2
70	2	1	1	1	2	1	2	2	1	1
71	2	1	1	2	2	2	1	2	2	2
72	1	1	1	2	1	2	1	1	1	1
73	1	1	2	1	2	1	1	2	2	1
74	1	1	2	2	1	2	2	1	1	2
75	2	2	1	2	2	2	1	1	2	1
76	2	1	1	1	1	2	1	1	2	1
77	1	2	1	2	1	2	1	2	2	1
78	1	2	2	2	1	2	2	1	1	1
79	1	2	2	2	2	2	2	1	2	1
80	2	1	1	1	2	1	1	2	1	1
81	1	2	2	1	2	2	1	1	2	2
82	2	1	1	1	2	1	2	2	2	1
83	1	2	2	2	2	2	2	1	1	2
84	1	1	1	2	1	2	1	1	2	1
